# Supplementary material
Source: PubMed Central journal article supplement (PMC4657750)
Supplement: NIHMS736795-supplement-Table_supp1.pdf [file NIHMS736795-supplement-Table_supp1.pdf]

**SUPPLEMENTAL Table (on line)**

Table 4a: Factors Associated with **Type B or C IRIS** in Case Control Conditional Logistic Regression Univariate and Multivariate Models in the HIV Outpatient Study, U.S. 1996-2007 (N=1,652)(mucocutaneous IRIS events excluded)

| Baseline factors                              | OR (95% CI)         | p-value | adjusted OR (95% CI) | p-value |
|-----------------------------------------------|---------------------|---------|----------------------|---------|
| Age (years)                                   |                     |         |                      |         |
| 35-49                                         | 0.81 (0.55, 1.20)   | 0.30    | 0.89 (0.53, 1.48)    | 0.64    |
| 50+                                           | 0.82 (0.48, 1.41)   | 0.48    | 1.36 (0.69, 2.71)    | 0.38    |
| 18-34                                         | referent            |         | referent             |         |
| Gender                                        |                     |         |                      |         |
| Female                                        | 2.50 (1.64, 3.81)   | <0.001  | 1.72 (0.84, 3.54)    | 0.14    |
| Male                                          | referent            |         | referent             |         |
| Race/ethnicity                                |                     |         |                      |         |
| White, non-Hispanic                           | referent            |         | referent             |         |
| All other                                     | 2.60 (1.83, 3.68)   | <0.001  | 1.28 (0.79, 2.08)    | 0.32    |
| HIV risk group                                |                     |         |                      |         |
| IDU                                           | 3.84 (2.26, 6.52)   | <0.001  | 1.91 (0.89, 4.10)    | 0.29    |
| HRH <sup>a</sup>                              | 3.08 (2.06, 4.62)   | <0.001  | 1.45 (0.73, 2.86)    | 0.098   |
| Other/unknown                                 | 1.34 (0.78, 2.31)   | 0.29    | 0.92 (0.30, 2.80)    | 0.89    |
| MSM                                           | referent            |         | referent             |         |
| CD4 count (cells/mm <sup>3</sup> )*           |                     |         |                      |         |
| <50                                           | 15.86 (9.14, 27.52) | <0.001  | 11.7 (6.28, 21.85)   | <0.001  |
| 50-199                                        | 3.56 (2.13, 5.94)   | <0.001  | 2.93 (1.68, 5.10)    | <0.001  |
| ≥200                                          | referent            |         | referent             |         |
| HIV viral load (log <sub>10</sub> copies/ml)* |                     |         |                      |         |
| <4                                            | referent            |         | referent             |         |
| 4-<5                                          | 1.99 (1.09, 3.64)   | 0.025   | 2.14 (0.97, 4.76)    | 0.061   |
| ≥5                                            | 5.43 (3.04, 9.72)   | <0.001  | 3.46 (1.59, 7.52)    | 0.002   |
| HCV or                                        |                     |         |                      |         |

|                |                      |       |                  |       |
|----------------|----------------------|-------|------------------|-------|
| HBVcoinfection |                      |       |                  |       |
| Yes            | 1.81 (1.18,<br>2.77) | 0.007 | 1.77 (0.95,3.31) | 0.073 |
| No             | referent             |       | referent         |       |
| TB Exposure    |                      |       |                  |       |
| Yes            | 1.89 (0.88,<br>4.08) | 0.10  | 0.68 (0.23,2.00) | 0.48  |
| No             | referent             |       | referent         |       |

---

\*Viral load and CD4 values closest to the start of a new or different cART within the preceding 180 days

<sup>a</sup>High Risk Heterosexual

NOTE: IDU, injection drug use; MSM, Men who have sex with men; TB tuberculosis; HCV, hepatitis C virus; HBV, hepatitis B virus.

**SUPPLEMENTAL Table (on-line)**

Table 4b: Factors Associated with **Mucocutaneous IRIS** in Case-Control Conditional Logistic Regression Univariate and Multivariable Models in the HIV Outpatient Study, U.S. 1996-2007 (N=1,678) (Type B and C IRIS events excluded)

| Baseline factors                              | OR (95% CI)       | p-value | Adjusted OR (95% CI) | p-value |
|-----------------------------------------------|-------------------|---------|----------------------|---------|
| Age (years)                                   |                   |         |                      |         |
| 35-49                                         | 0.82 (0.57, 1.17) | 0.28    | 0.63 (0.41, 0.96)    | 0.032   |
| 50+                                           | 0.49 (0.57, 0.86) | 0.013   | 0.42 (0.22,0.81)     | 0.009   |
| 18-34                                         | referent          |         | referent             |         |
| Gender                                        |                   |         |                      |         |
| Female                                        | 1.20 (0.77, 1.87) | 0.42    | 0.73 (0.38, 1.42)    | 0.36    |
| Male                                          | referent          |         | referent             |         |
| Race/ethnicity                                |                   |         |                      |         |
| White, non-Hispanic                           | referent          |         | referent             |         |
| All other                                     | 2.34 (1.70, 3.22) | <0.001  | 1.69 (1.14,2.51)     | 0.010   |
| HIV risk group                                |                   |         |                      |         |
| IDU                                           | 1.59 (0.90, 2.82) | 0.11    | 1.19 (0.56, 2.54)    | 0.65    |
| HRH <sup>a</sup>                              | 1.65 (1.11, 2.45) | 0.013   | 1.66 (0.89, 3.10)    | 0.11    |
| Other/unknown                                 | 1.13 (0.55, 2.32) | 0.73    | 0.76 (0.32, 1.81)    | 0.54    |
| MSM                                           | referent          |         | referent             |         |
| CD4 count (cells/mm <sup>3</sup> )*           |                   |         |                      |         |
| <50                                           | 4.42 (2.88, 6.77) | <0.001  | 3.04 (1.87, 4.96)    | <0.001  |
| 50-199                                        | 2.20 (1.45, 3.35) | <0.001  | 2.06 (1.32,3.22)     | 0.002   |
| ≥200                                          | referent          |         | referent             |         |
| HIV viral load (log <sub>10</sub> copies/ml)* |                   |         |                      |         |
| <4                                            | referent          |         | referent             |         |
| 4-<5                                          | 1.17 (0.72, 1.90) | 0.53    | 1.01 (0.59,1.72)     | 0.97    |
| ≥5                                            | 2.83 (1.77,4.52)  | <0.001  | 1.93 (1.12,3.34)     | 0.018   |
| HCV or HBV co-infection                       |                   |         |                      |         |
| Yes                                           | 0.99 (0.61, 1.62) | 0.98    | 0.83 (0.46, 1.49)    | 0.53    |
| No                                            | referent          |         | referent             |         |
| TB Exposure                                   |                   |         |                      |         |
| Yes                                           | 1.11 (0.54, 2.28) | 0.77    | 1.20 (0.54,2.64)     | 0.66    |
| No                                            | referent          |         | referent             |         |

\*Viral load and CD4 values closest to the start of a new or different cART within the preceding 180 days

<sup>a</sup>High Risk Heterosexual

NOTE: IDU, injection drug use; MSM, Men who have sex with men; TB tuberculosis; HCV, hepatitis C virus; HBV, hepatitis B virus.
